# Supplementary material
Source: PubMed Central journal article supplement (PMC4779665)
Supplement: NIHMS754383-supplement-1.pdf [file NIHMS754383-supplement-1.pdf]

Table S1: Summary of the number of reads and sequences that were used to analyze the TRB repertoire in naïve CD8<sup>+</sup> T cells and influenza specific CTLs

| Sample Code     | Sample Description                                               | No. of total sequences | No. of unique sequences | No. of productive sequences | No. of unique productive sequences | Gene Rearrangements | Clonality: Pielou's evenness |
|-----------------|------------------------------------------------------------------|------------------------|-------------------------|-----------------------------|------------------------------------|---------------------|------------------------------|
| 3_day_Neo 1     | Naïve, CD8 <sup>+</sup> CD44 <sup>-</sup>                        | 636                    | 57                      | 363                         | 23                                 | 66                  | 0.07                         |
| 3_day_Neo 2     | Naïve, CD8 <sup>+</sup> CD44 <sup>-</sup>                        | 1650                   | 179                     | 1018                        | 104                                | 202                 | 0.08                         |
| 3_day_Neo 3     | Naïve, CD8 <sup>+</sup> CD44 <sup>-</sup>                        | 3721                   | 283                     | 2336                        | 177                                | 309                 | 0.07                         |
| 3_day_Neo 4     | Naïve, CD8 <sup>+</sup> CD44 <sup>-</sup>                        | 285                    | 31                      | 180                         | 22                                 | 35                  | 0.14                         |
| 7_day_Neo 1     | Naïve, CD8 <sup>+</sup> CD44 <sup>-</sup>                        | 68,489                 | 6150                    | 50,152                      | 4387                               | 6981                | 0.04                         |
| 7_day_Neo 2     | Naïve, CD8 <sup>+</sup> CD44 <sup>-</sup>                        | 19,548                 | 1709                    | 14,374                      | 1242                               | 1819                | 0.04                         |
| 7_day_Neo 3     | Naïve, CD8 <sup>+</sup> CD44 <sup>-</sup>                        | 44,538                 | 2043                    | 32,764                      | 1473                               | 2182                | 0.03                         |
| 7_day_Neo 4     | Naïve, CD8 <sup>+</sup> CD44 <sup>-</sup>                        | 83,158                 | 2686                    | 60,074                      | 1890                               | 2851                | 0.03                         |
| 7_day_Neo 5     | Naïve, CD8 <sup>+</sup> CD44 <sup>-</sup>                        | 6150                   | 411                     | 4439                        | 295                                | 425                 | 0.04                         |
| Adult 1         | Naïve, CD8 <sup>+</sup> CD44 <sup>-</sup>                        | 482,749                | 53,414                  | 358,073                     | 38,991                             | 56,978              | 0.02                         |
| Adult 2         | Naïve, CD8 <sup>+</sup> CD44 <sup>-</sup>                        | 197,827                | 21,069                  | 144,729                     | 15,049                             | 21,608              | 0.02                         |
| Adult 3         | Naïve, CD8 <sup>+</sup> CD44 <sup>-</sup>                        | 148,382                | 17,076                  | 108,254                     | 12,284                             | 17,902              | 0.04                         |
| Adult 4         | Naïve, CD8 <sup>+</sup> CD44 <sup>-</sup>                        | 1,079,304              | 82,662                  | 789,667                     | 59,232                             | 88,520              | 0.03                         |
| Adult 5         | Naïve, CD8 <sup>+</sup> CD44 <sup>-</sup>                        | 742,911                | 54,504                  | 538,712                     | 38,756                             | 57,665              | 0.03                         |
| 3_day_Neo 1 Flu | 10 DPI, CD8 <sup>+</sup><br>NP <sub>(366-374)</sub> <sup>+</sup> | 148,975                | 1649                    | 80,028                      | 1164                               | 6611                | 0.46                         |
| 3_day_Neo 2 Flu | 10 DPI, CD8 <sup>+</sup><br>NP <sub>(366-374)</sub> <sup>+</sup> | 156,588                | 939                     | 107,832                     | 648                                | 3590                | 0.44                         |
| 3_day_Neo 3 Flu | 10 DPI, CD8 <sup>+</sup><br>NP <sub>(366-374)</sub> <sup>+</sup> | 37,202                 | 723                     | 29,149                      | 519                                | 2358                | 0.34                         |
| Adult 1 Flu     | 10 DPI, CD8 <sup>+</sup><br>NP <sub>(366-374)</sub> <sup>+</sup> | 1,211,772              | 2795                    | 878,101                     | 1895                               | 50112               | 0.55                         |
| Adult 2 Flu     | 10 DPI, CD8 <sup>+</sup><br>NP <sub>(366-374)</sub> <sup>+</sup> | 680,199                | 966                     | 440,679                     | 637                                | 49080               | 0.49                         |
| Adult 3 Flu     | 10 DPI, CD8 <sup>+</sup><br>NP <sub>(366-374)</sub> <sup>+</sup> | 948,075                | 1805                    | 842,455                     | 1245                               | 30967               | 0.62                         |

Table S2: Shared amino acid sequences for the adult and 3-day neonatal samples infected with influenza.

Number of reads within the sample (percentage of total productive sequences)

| <b>Adult Shared Sequences</b>    | <b>Adult 1 Flu</b> | <b>Adult 2 Flu</b> | <b>Adult 3 Flu</b> | <b>3_day Neo 1 Flu</b> | <b>3_day Neo 2 Flu</b> | <b>3_day Neo 3 Flu</b> |
|----------------------------------|--------------------|--------------------|--------------------|------------------------|------------------------|------------------------|
| CASSGGSNTGQLYF                   | 235741 (26.9)      | 27265 (6.2)        | 229052 (27.2)      | 0                      | 0                      | 0                      |
| CASSGGANTGQLYF                   | 158643 (18.1)      | 55902 (12.7)       | 32410 (3.9)        | 0                      | 0                      | 1237 (4.2)             |
| CASRGGANTGQLYF                   | 41949 (4.8)        | 56457 (12.8)       | 15650 (1.9)        | 0                      | 0                      | 0                      |
| CASSGGGNTGQLYF                   | 69866 (8.0)        | 35049 (8.0)        | 567 (0.1)          | 0                      | 0                      | 0                      |
| CASSQDRRNSYNSPLYF                | 2739 (0.3)         | 9285 (2.1)         | 8275 (1.0)         | 0                      | 0                      | 0                      |
| CASSLARDEQYF                     | 3342 (0.4)         | 5150 (1.2)         | 5134 (0.6)         | 0                      | 0                      | 0                      |
| CASSGDSAETLYF                    | 4562 (0.5)         | 23 (0.01)          | 1006 (0.1)         | 0                      | 0                      | 0                      |
| CASSQDSAETLYF                    | 1021 (0.1)         | 224 (0.1)          | 919 (0.1)          | 0                      | 123 (0.1)              | 2 (0.001)              |
| CASRDSANTEVFF                    | 284 (0.03)         | 4 (0.001)          | 1482 (0.2)         | 0                      | 0                      | 0                      |
| CASSPDSAETLYF                    | 122 (0.01)         | 46 (0.01)          | 1422 (0.2)         | 23 (0.03)              | 0                      | 0                      |
| <b>Neonatal Shared Sequences</b> |                    |                    |                    |                        |                        |                        |
| CASSLGGEQYF                      | 104 (0.01)         | 0                  | 0                  | 4547 (5.7)             | 367 (0.3)              | 61 (0.2)               |
| CASSLGAEQFF                      | 35 (0.004)         | 0                  | 0                  | 32 (0.04)              | 4481 (4.2)             | 2 (0.01)               |
| CASSMGAEVFF                      | 204 (0.02)         | 0                  | 0                  | 807 (1.0)              | 275 (0.3)              | 112 (0.4)              |
| CASSMGGQNTLYF                    | 0                  | 0                  | 0                  | 36 (0.04)              | 7 (0.01)               | 676 (2.3)              |
| CASSLGQGGNTLYF                   | 14 (0.002)         | 9 (0.002)          | 0                  | 17 (0.02)              | 47 (0.04)              | 389 (1.3)              |
| CASSRDWGGTGQLYF                  | 0                  | 0                  | 0                  | 5 (0.006)              | 28 (0.03)              | 297 (1.0)              |
| CASSLGSGNTLYF                    | 0                  | 0                  | 0                  | 58 (0.07)              | 75 (0.1)               | 98 (0.3)               |
| CASSDWGQNTLYF                    | 0                  | 0                  | 0                  | 17 (0.02)              | 186 (0.2)              | 7 (0.02)               |
| CASSWGGYAEQFF                    | 0                  | 0                  | 0                  | 2 (0.003)              | 71 (0.1)               | 64 (0.2)               |
| CASSLDWGGYEQYF                   | 15 (0.002)         | 0                  | 17 (0.002)         | 81 (0.1)               | 37 (0.03)              | 3 (0.01)               |
